# Supplementary material
Source: PubMed Central journal article supplement (PMC3672941)
Supplement: supp_126.10.2294_JCS126011.pdf [file supp_126.10.2294_JCS126011.pdf]

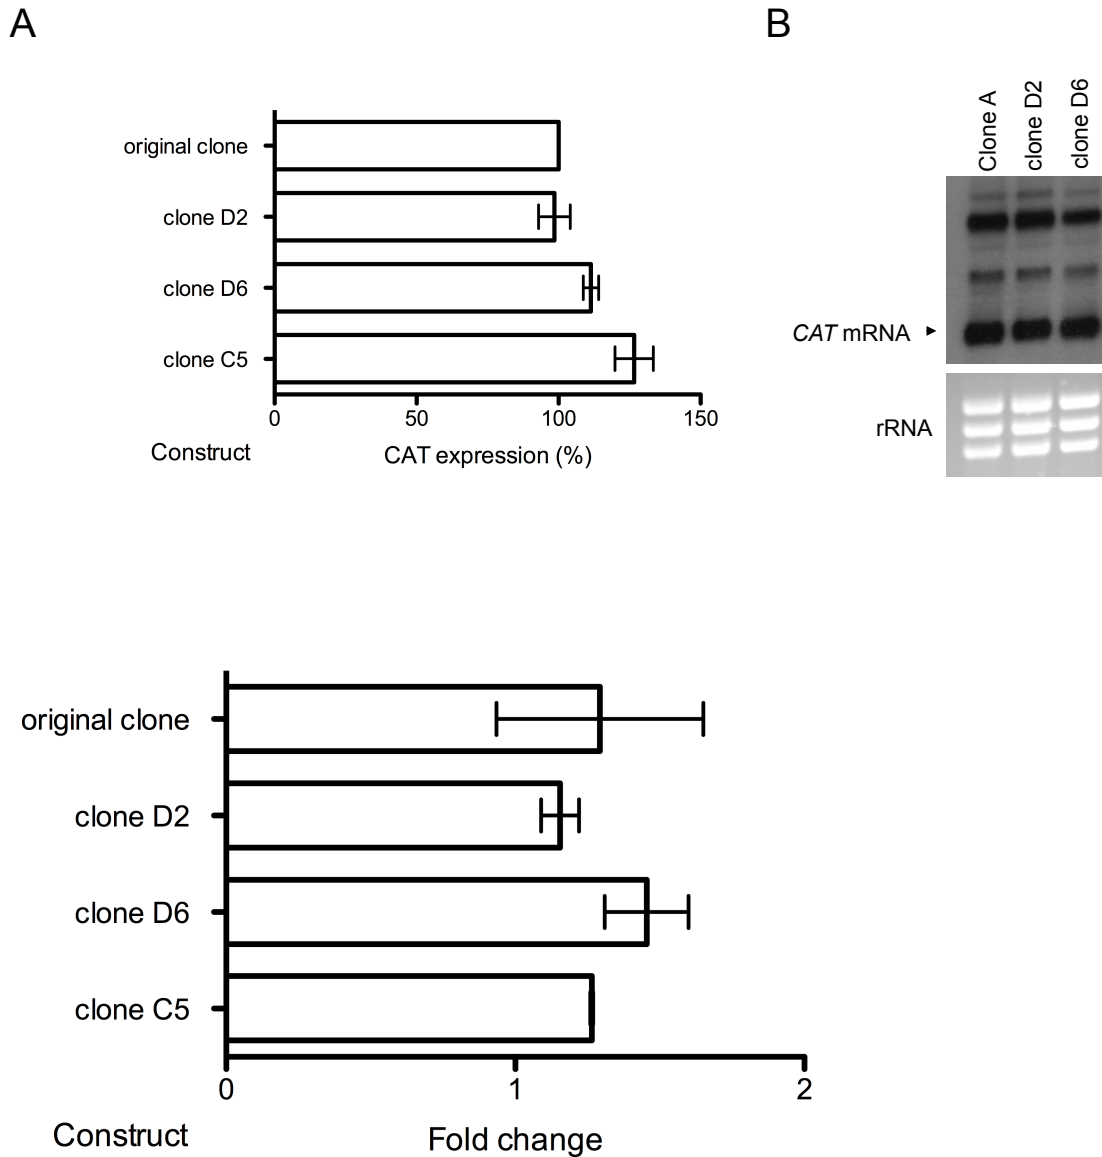

**Figure S1**

*Upper panel.* Relative CAT expression of four independent cell lines transfected with the  $\Delta$ ALD construct. Clone A (“Original clone”) was used in all experiments in this study to provide a comparator for the relative expression of the various *ESAG9-EQ* 3’UTR constructs. Protein expression is indicated in the left hand panel, with mean  $\pm$  standard error of two experimental replicates being shown. RNA expression is shown in the right hand panel, with ethidium bromide staining of the rRNA providing a loading control.

*Lower panel.* Relative CAT protein expression from the various  $\Delta$ ALD cell lines after exposure to cell permeable cAMP. In all cases a small ( $\sim$ 1.3 fold) increase in CAT protein expression was observed. Mean  $\pm$  standard error of experimental replicates are shown ( $n = 2$ , except original clone where  $n = 4$ ).

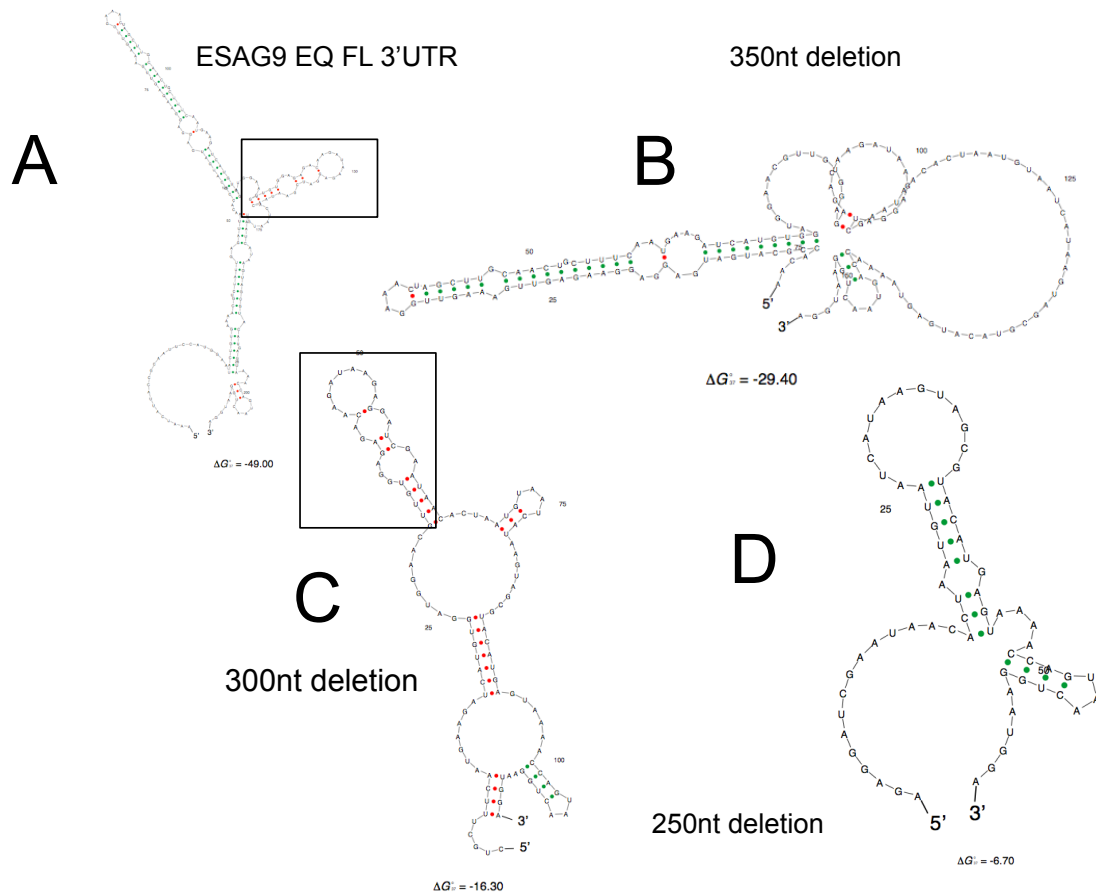

**Figure S2**

Sfold predicted structures for the intact *ESAG9-EQ* 3'UTR or for deletions of it used in this analysis. The predicted structure associated with the 'regulatory element' characterised in this study is boxed in the 'full length' ('ESAG9-EQ FL 3'UTR') and 300nt 3'UTR deletion. The 250nt and 350nt deletion constructs are not predicted to form the structure.

**Table S1.** Prediction of the probability of secondary structure formation among different ESAG9 3'UTRs using UNAFold (Markham and Zuker, 2005) within the SSE package (Simmonds, 2012). Details of the analysis are provided within the 'Materials and Methods'. Yellow highlighting shows MFED and Z-score values predictive of a secondary structure in the sequence. Grey shading shows mutant or anti-sense ESAG9-EQ sequences without support for secondary structure, contrasting with the sense intact version.

| Sequence     | Orientation | Divergence | Native MFE | Control MFE | Control SD | MFED    | Z-score |
|--------------|-------------|------------|------------|-------------|------------|---------|---------|
| ESAG9 EQ     | Sense       | 0.219      | -50.1      | -42.04      | 4.0102     | 0.1917  | -2.0099 |
| ESAG9 K9     | Sense       | 0.23       | -48.9      | -49.283     | 4.1139     | -0.0078 | 0.0931  |
| ESAG9 k69    | Sense       | 0.239      | -49.2      | -44.872     | 4.3029     | 0.0965  | -1.0058 |
| Tb927.1.5080 | Sense       | 0.227      | -59.9      | -54.951     | 3.774      | 0.0901  | -1.3114 |
| Tb927.3.5790 | Sense       | 0.23       | -54.8      | -54.29      | 3.9161     | 0.0094  | -0.1302 |
| Tb927.9.7370 | Sense       | 0.229      | -36.5      | -39.771     | 3.7807     | -0.0822 | 0.8651  |
| ESAG9u       | Sense       | 0.229      | -46        | -46.834     | 3.9262     | -0.0178 | 0.2124  |
| ESAG9c       | Sense       | 0.231      | -46.9      | -48.613     | 3.9979     | -0.0352 | 0.4285  |
| ESAG9 EQ     | A/Sense     | 0.219      | -30.4      | -32.357     | 3.222      | -0.0605 | 0.6074  |
| ESAG9 K9     | A/Sense     | 0.23       | -40.9      | -39.953     | 3.4965     | 0.0237  | -0.2708 |
| ESAG9 k69    | A/Sense     | 0.239      | -54.4      | -47.299     | 3.9103     | 0.1501  | -1.8161 |
| Tb927.1.5080 | A/Sense     | 0.227      | -49.2      | -44.987     | 3.9318     | 0.0937  | -1.0716 |
| Tb927.3.5790 | A/Sense     | 0.23       | -37.9      | -41.393     | 3.3743     | -0.0844 | 1.0351  |
| Tb927.9.7370 | A/Sense     | 0.229      | -42.8      | -40.804     | 3.2919     | 0.0489  | -0.6062 |
| ESAG9u       | A/Sense     | 0.229      | -28.4      | -32.838     | 3.3341     | -0.1352 | 1.3312  |
| ESAG9c       | A/Sense     | 0.231      | -35.9      | -39.132     | 3.3805     | -0.0826 | 0.956   |
| ESAG9 EQ ΔE  | Sense       | 0.553      | -39.1      | -37.587     | 3.3569     | 0.0403  | -0.4507 |
| ESAG9 EQ ΔE  | A/Sense     | 0.551      | -27.2      | -28.888     | 3.1709     | -0.0584 | 0.5323  |
